# Supplementary material for: Construction and Validation of a Nomogram Clinical Prediction Model for Predicting Osteoporosis in an Asymptomatic Elderly Population in Beijing
Source: MDPI journal article supplement (doi:10.3390/jcm12041292), 2023-02-06
Supplement: s1 [file s1]

**Table S5. Internal validation for training group and validation group.**

|                          | Training group     |                    | Validation group   |                    |
|--------------------------|--------------------|--------------------|--------------------|--------------------|
|                          | AUC[95%CI]         | C-index[95%CI]     | AUC[95%CI]         | C-index[95%CI]     |
| 3 fold cross validation  | 0.751[0.746,0.756] | 0.746[0.741,0.751] | 0.750[0.742,0.758] | 0.744[0.736,0.752] |
| 5 fold cross validation  | 0.751[0.745,0.758] | 0.746[0.740,0.753] | 0.752[0.741,0.764] | 0.747[0.735,0.758] |
| 10 fold cross validation | 0.750[0.738,0.761] | 0.746[0.735,0.757] | 0.750[0.732,0.768] | 0.744[0.726,0.763] |
| Jackknife validation     | 0.746              | 0.746              | 0.738              | 0.738              |
| Bootstrap validation     | 0.761[0.759,0.765] | 0.756[0.754,0.760] | 0.775[0.770,0.780] | 0.769[0.764,0.774] |

**Notes:** Internal validation results (AUC and C-index) based on 5 different methods. 3 fold, 5 fold and 10 fold validation with 200 iterations. Jackknife validation with 438 iterations for training group. Jackknife validation with 146 iterations for validation group. Bootstrap validation with 200 iterations. **Abbreviations:** AUC, area under the ROC curve; C-index, concordance index; CI, confidence interval.
