# Supplementary material for: Construction and Validation of a Nomogram Clinical Prediction Model for Predicting Osteoporosis in an Asymptomatic Elderly Population in Beijing
Source: MDPI journal article supplement (doi:10.3390/jcm12041292), 2023-02-06
Supplement: s1 [file s1]

**Table S3. Univariate and multivariate logistic regression analysis for the training group.**

| Clinical factors       |        | No osteoporosis (N=253) | Osteoporosis (N=185) | OR (univariable)         | OR (multivariable)       |
|------------------------|--------|-------------------------|----------------------|--------------------------|--------------------------|
| <b>Age</b>             |        | 66.9±6.7                | 67.5±6.2             | 1.02 (0.99-1.05, p=.317) |                          |
| <b>Gender</b>          | Male   | 93 (36.8%)              | 26 (14.1%)           | 3.55 (2.18-5.79, p<.001) | 2.92 (1.21-7.06, p=.017) |
|                        | Female | 160 (63.2%)             | 159 (85.9%)          |                          |                          |
| <b>Manual laborers</b> | No     | 175 (69.2%)             | 117 (63.2%)          | 1.30 (0.87-1.95, p=.194) | 1.14 (0.71-1.84, p=.590) |
|                        | Yes    | 78 (30.8%)              | 68 (36.8%)           |                          |                          |
| <b>Education Level</b> | 1      | 49 (19.4%)              | 84 (45.4%)           | 0.31 (0.20-0.50, p<.001) | 0.40 (0.24-0.67, p<.001) |
|                        | 2      | 125 (49.4%)             | 67 (36.2%)           |                          |                          |
|                        | 3      | 79 (31.2%)              | 34 (18.4%)           |                          |                          |
| <b>Height</b>          |        | 162 [158;169]           | 160[155;164]         | 0.94 (0.91-0.96, p<.001) | 1.04 (0.99-1.08, p=.108) |
| <b>Weight</b>          |        | 67.0 [60.0;75.0]        | 60.0 [55.0;65.0]     | 0.90 (0.88-0.92, p<.001) | 0.91 (0.88-0.94, p<.001) |
| <b>Waistline</b>       |        | 86.0 [80.0;92.0]        | 80.0 [76.0;86.0]     | 0.94 (0.92-0.96, p<.001) | 0.99 (0.96-1.02, p=.607) |
| <b>Smoking</b>         | No     | 219 (86.6%)             | 169 (91.4%)          | 0.61 (0.33-1.14, p=.122) | 1.84 (0.68-4.96, p=.231) |
|                        | Yes    | 34 (13.4%)              | 16 (8.6%)            |                          |                          |
| <b>Drinking</b>        | No     | 217 (85.8%)             | 172 (93%)            | 0.46 (0.23-0.89, p=.020) | 1.20 (0.46-3.13, p=.712) |
|                        | Yes    | 36 (14.2%)              | 13 (7%)              |                          |                          |

**Notes:** Univariate logistics regression analysis was performed for all factors. Multivariate logistics regression analysis was performed for statistically significant factors. Odds ratios, confidence intervals, and p-values were shown.  $p < 0.05$  meant the difference was statistically significant. Numerical variables for normality were represented as mean  $\pm$  standard deviation. Non-normal numerical variables were represented by median  $\pm$  upper and lower quartiles. Categorical variables were represented by frequency and percentage. The “1”, “2” and “3” for “Education Level” stand for “Junior high school”, “High school” and “Undergraduate”. **Abbreviations:** OR, Odds ratios; CI, confidence intervals.
