# Supplementary material for: Construction and Validation of a Nomogram Clinical Prediction Model for Predicting Osteoporosis in an Asymptomatic Elderly Population in Beijing
Source: MDPI journal article supplement (doi:10.3390/jcm12041292), 2023-02-06
Supplement: s1 [file s1]

**Table S4. Univariate and multivariate logistic regression analysis for the validation group.**

| Clinical factors       |        | No osteoporosis (N=83) | Osteoporosis (N=63) | OR (univariable)          | OR (multivariable)       |
|------------------------|--------|------------------------|---------------------|---------------------------|--------------------------|
| <b>Age</b>             |        | 65.6 ± 6.9             | 66.8 ± 5.4          | 1.03 (0.98-1.09, p=.256)  |                          |
| <b>Gender</b>          | Male   | 34 (41%)               | 8 (12.7%)           | 4.77 (2.02-11.29, p<.001) | 1.35 (0.29-6.39, p=.705) |
|                        | Female | 49 (59%)               | 55 (87.3%)          |                           |                          |
| <b>Manual laborers</b> | No     | 50 (60.2%)             | 39 (61.9%)          | 0.93 (0.48-1.83, p=.838)  |                          |
|                        | Yes    | 33 (39.8%)             | 24 (38.1%)          |                           |                          |
| <b>Education Level</b> | 1      | 18 (21.7%)             | 28 (44.4%)          | 0.50 (0.23-1.08, p=.078)  | 0.45 (0.19-1.08, p=.075) |
|                        | 2      | 36 (43.4%)             | 28 (44.4%)          |                           |                          |
|                        | 3      | 29 (34.9%)             | 7 (11.1%)           |                           |                          |
| <b>Height</b>          |        | 163 [160;171]          | 158[156;162]        | 0.91 (0.87-0.96, p<.001)  | 0.99 (0.91-1.07, p=.783) |
| <b>Weight</b>          |        | 67.0 [61.0;74.5]       | 60.0 [54.0;65.0]    | 0.90 (0.86-0.94, p<.001)  | 0.93 (0.87-1.00, p=.035) |
| <b>Waistline</b>       |        | 85.0 [80.0;90.0]       | 80.0 [76.0;86.5]    | 0.93 (0.89-0.97, p=.002)  | 0.98 (0.92-1.04, p=.546) |
| <b>Smoking</b>         | No     | 66 (79.5%)             | 60 (95.2%)          | 0.19 (0.05-0.70, p=.012)  | 0.45 (0.08-2.51, p=.363) |
|                        | Yes    | 17 (20.5%)             | 3 (4.8%)            |                           |                          |
| <b>Drinking</b>        | No     | 68 (81.9%)             | 60 (95.2%)          | 0.23 (0.06-0.82, p=.024)  | 1.15 (0.22-5.95, p=.871) |
|                        | Yes    | 15 (18.1%)             | 3 (4.8%)            |                           |                          |

**Notes:** Univariate logistics regression analysis was performed for all factors. Multivariate logistics regression analysis was performed for statistically significant factors. Odds ratios, confidence intervals, and p-values were shown.  $p < 0.05$  meant the difference was statistically significant. Numerical variables for normality were represented as mean ± standard deviation. Non-normal numerical variables were represented by median ± upper and lower quartiles. Categorical variables were represented by frequency and percentage. The “1”, “2” and “3” for “Education Level” stand for “Junior high school”, “High school” and “Undergraduate”. **Abbreviations:** OR, Odds ratios; CI, confidence intervals.
