# Supplementary material for: Construction and Validation of a Nomogram Clinical Prediction Model for Predicting Osteoporosis in an Asymptomatic Elderly Population in Beijing
Source: MDPI journal article supplement (doi:10.3390/jcm12041292), 2023-02-06
Supplement: s1 [file s1]

**Table S1. Comparison of baseline data for the training and validation groups.**

|                         | Training group<br><i>N=438</i> | Validation group<br><i>N=146</i> | p.value |
|-------------------------|--------------------------------|----------------------------------|---------|
| <b>OP:</b>              |                                |                                  | 0.923   |
| No osteoporosis         | 253 (57.8%)                    | 83 (56.8%)                       |         |
| Osteoporosis            | 185 (42.2%)                    | 63 (43.2%)                       |         |
| <b>Age</b>              | 67.2±6.48                      | 66.1±6.31                        | 0.095   |
| <b>Gender:</b>          |                                |                                  | 0.789   |
| Female                  | 319 (72.8%)                    | 104 (71.2%)                      |         |
| Male                    | 119 (27.2%)                    | 42 (28.8%)                       |         |
| <b>Manual laborers:</b> |                                |                                  | 0.249   |
| No                      | 292 (66.7%)                    | 89 (61.0%)                       |         |
| Yes                     | 146 (33.3%)                    | 57 (39.0%)                       |         |
| <b>Education Level:</b> |                                |                                  | 0.950   |
| junior high school      | 133 (30.4%)                    | 46 (31.5%)                       |         |
| high school             | 192 (43.8%)                    | 64 (43.8%)                       |         |
| undergraduate           | 113 (25.8%)                    | 36 (24.7%)                       |         |
| <b>Height</b>           | 160 [156;167]                  | 161 [157;168]                    | 0.460   |
| <b>Weight</b>           | 64.0 [58.0;70.0]               | 65.0 [59.0;70.0]                 | 0.886   |
| <b>Waistline</b>        | 84.0 [79.0;90.0]               | 84.0 [79.0;90.0]                 | 0.797   |
| <b>Smooking:</b>        |                                |                                  | 0.556   |
| No                      | 388 (88.6%)                    | 126 (86.3%)                      |         |
| Yes                     | 50 (11.4%)                     | 20 (13.7%)                       |         |
| <b>Drinking:</b>        |                                |                                  | 0.822   |
| No                      | 389 (88.8%)                    | 128 (87.7%)                      |         |
| Yes                     | 49 (11.2%)                     | 18 (12.3%)                       |         |

**Notes:** Numerical variables for normality were represented as mean ± standard deviation. Non-normal numerical variables were represented by median ± upper and lower quartiles. Categorical variables were represented by frequency and percentage. p<0.05 meant the difference was statistically significant.
