# Supplementary material for: Construction and Validation of a Nomogram Clinical Prediction Model for Predicting Osteoporosis in an Asymptomatic Elderly Population in Beijing
Source: MDPI journal article supplement (doi:10.3390/jcm12041292), 2023-02-06
Supplement: s1 [file s1]

**Table S2. Interaction effects among various clinical factors.**

|                             | Age | Gender | Manualla<br>borers | Education<br>Level II vs I | Education<br>Level III vs I | Height | Weight | Waistline | Smooking | Drinking |
|-----------------------------|-----|--------|--------------------|----------------------------|-----------------------------|--------|--------|-----------|----------|----------|
| Age                         |     | 0.7924 | 0.1594             | 0.3519                     | 0.5774                      | 0.5466 | 0.5354 | 0.5797    | 0.8676   | 0.14     |
| Gender                      |     |        | 0.4264             | 0.8687                     | 0.9951                      | 0.882  | 0.2483 | 0.291     | 0.7471   | 0.6966   |
| Manualla<br>borers          |     |        |                    | 0.3474                     | 0.3472                      | 0.5743 | 0.9451 | 0.6882    | 0.1595   | 0.3773   |
| Education<br>Level II vs I  |     |        |                    |                            |                             |        |        |           |          |          |
| Education<br>Level III vs I |     |        |                    |                            |                             |        |        |           |          |          |
| Height                      |     |        |                    | 0.6104                     | 0.537                       |        | 0.2624 | 0.0064*   | 0.7421   | 0.3224   |
| Weight                      |     |        |                    | 0.5019                     | 0.2152                      |        |        | 0.0659    | 0.4531   | 0.4587   |
| Waistline                   |     |        |                    | 0.0368                     | 0.1677                      |        |        |           | 0.6958   | 0.9956   |
| Smooking                    |     |        |                    | 0.8305                     | 0.4171                      |        |        |           |          | 0.7786   |
| Drinking                    |     |        |                    | 0.956                      | 0.7235                      |        |        |           |          |          |

**Notes:** Numerical variables were transformed into binary variables, and multi-categorical variables were transformed into dummy variables, and then the interaction effects were analyzed. \* $p < 0.05$ , which meant the interaction between the two factors was statistically significant.
